# Supplementary material for: Hyper Cross-Linked Polymers as Additives for Preventing Aging of PIM-1 Membranes
Source: MDPI journal article supplement (doi:10.3390/membranes11070463), 2021-06-22
Supplement: s1 [file s1]

# Hyper Cross-Linked Polymers as Additives for Preventing Aging of PIM-1 Membranes

Federico Begni<sup>1</sup>, Elsa Lasseguette<sup>2</sup>, Geo Paul<sup>1</sup>, Chiara Bisio<sup>1,3</sup>, Leonardo Marchese<sup>1</sup>, Giorgio Gatti<sup>1,\*</sup> and Maria-Chiara Ferrari<sup>2,\*</sup>

**Table S1.** Elemental analysis performed via EDX spectroscopy on ABT01 and ABT02 materials. Five measurements were performed on each sample and the mean values are here reported.

| Element | ABT01 (wt %) | ABT02 (wt %) |
|---------|--------------|--------------|
| C       | 98.50        | 98.47        |
| Al      | 0.75         | 0.64         |
| Br      | 0.63         | 0.88         |
